# Supplementary material for: Quantitative Detection of Mastitis Factor IL-6 in Dairy Cow Using the SERS Improved Immunofiltration Assay
Source: MDPI journal article supplement (doi:10.3390/nano12071091), 2022-03-26
Supplement: s1 [file s1]

## Supplementary Materials

# Quantitative Detection of Mastitis Factor IL-6 in Dairy Cow Using the SERS Improved Immunofiltration Assay

Ruipeng Chen <sup>1,\*</sup>, Hui Wang <sup>1</sup>, Yiguang Zhao <sup>1</sup>, Xuemei Nan <sup>1</sup>, Wensong Wei <sup>2</sup>, Chunmei Du <sup>1</sup>, Fan Zhang <sup>1</sup>, Qingyao Luo <sup>1</sup>, Liang Yang <sup>1,\*</sup> and Benhai Xiong <sup>1,\*</sup>

<sup>1</sup> State Key Laboratory of Animal Nutrition, Institute of Animal Science, Chinese Academy of Agricultural Sciences, Beijing 100193, China; wanghui\_lunwen@163.com (H.W.); zhaoyiguang@caas.cn (Y.Z.); xuemeinan@126.com (X.N.); duchunmeim@163.com (C.D.); zhangfan19@139.com (F.Z.); luqingyao@caas.cn (Q.L.)

<sup>2</sup> Institute of Food Science and Technology, Chinese Academy of Agricultural Sciences, Beijing 100193, China; weiwensong@caas.cn

\* Correspondence: chenruipeng@caas.cn (R.C.); yangliang@caas.cn (L.Y.); xiongbenhai@caas.cn (B.X.); Tel.: +86-010-62811680 (B.X.)

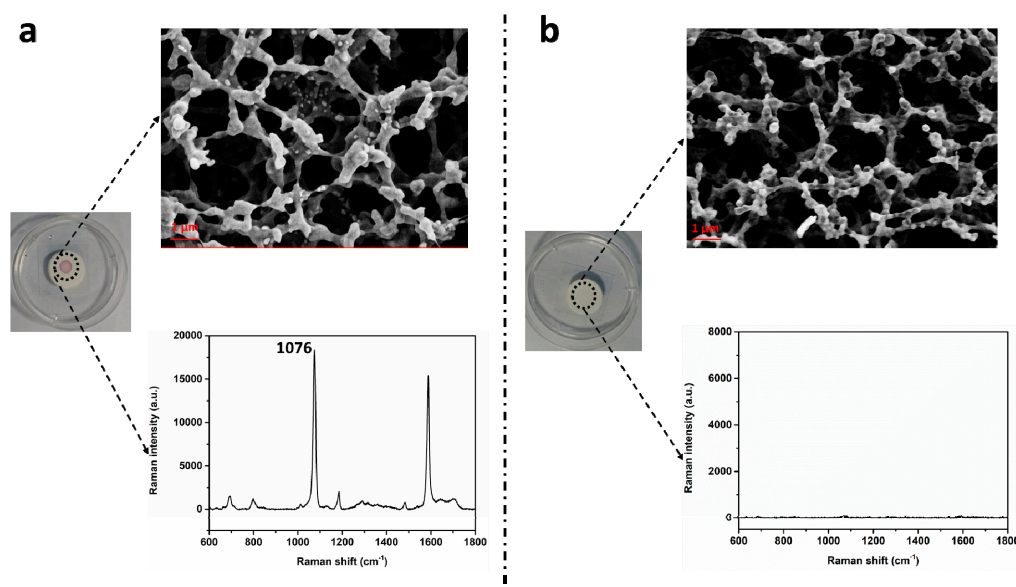

**Figure S1** Feasibility test of the SERS improved IFA. The test with (a) and without IL-6 (b), and the typical pictures of their corresponding SEM images and SERS spectra of the test dots, respectively.

**Table S1** Comparison of different detection methods for inflammatory biomarker IL-6.

| No. | Method       | Limit of detection (LOD) | Literature |
|-----|--------------|--------------------------|------------|
| 1   | LA           | 0.5 pg mL <sup>-1</sup>  | [1]        |
| 2   | IA           | 1.6 pg mL <sup>-1</sup>  | [2]        |
| 3   | CLIA         | 0.5 pg mL <sup>-1</sup>  | [3]        |
| 4   | EIS          | 1.0 pg mL <sup>-1</sup>  | [4]        |
| 5   | SERS         | 0.54 pg mL <sup>-1</sup> | [5]        |
| 6   | SERS nanotag | 0.35 pg mL <sup>-1</sup> | This work  |

**Table S2** The detection and recoveries test of the spiked IL-6 in milk sample.

| NO. | ECLIA <sup>a</sup> (ng mL <sup>-1</sup> ) | SERS VFA <sup>b</sup> (ng mL <sup>-1</sup> ) | Recovery (%) | RSD <sup>c</sup> (%) |
|-----|-------------------------------------------|----------------------------------------------|--------------|----------------------|
| 1   | 0.18                                      | 0.16±0.07                                    | 88.9         | 8.7                  |
| 2   | 35.7                                      | 32.8±5.76                                    | 91.9         | 5.2                  |
| 3   | 167.4                                     | 145.6±13.36                                  | 87.0         | 4.7                  |
| 4   | 236.5                                     | 242.8±15.08                                  | 102.7        | 2.5                  |
| 5   | 504.1                                     | 487.2±12.65                                  | 96.7         | 6.4                  |

<sup>a</sup>ECLIA is the abbreviation of electrochemiluminescent immunoassay.

<sup>b</sup>The average value is calculated from three repeats.

<sup>c</sup>RSD is short for relative standard deviation.

## References

- [1] Rathnayake, N.; Akerman, S.; Klinge, B.; Lundegren, N.; Jansson H.; Sorsa, Y.T.; Gustafsson, A. Salivary biomarkers for detection of systemic diseases. *Plos One*, **2013**, *8*, e61356–e61361.
- [2] Tertis, M.; Leva, P.I.; Bogdan, D.; Suci, M.; Graur, F.; Cristea, C. Impedimetric aptasensor for the label-free and selective detection of interleukin-6 for colorectal cancer screening. *Biosens. Bioelectron.* **2019**, *137*, 123–132.

- [3] Luo, L.R.; Zhang, Z.J.; Hou, L.Y.; Wang, J.L.; W. Tian, The study of a chemiluminescence immunoassay using the peroxyoxalate chemiluminescent reaction and its application, *Talanta*, **2007**, 72, 1293–1297.
- [4] Barman, S.C.; Sharifuzzaman, M.; Zahed, M.A.; Park, C.; Yoon, S.H.; Zhang, S. P.; Kim, H.; Yoon, H.; Park, J.Y. A highly selective and stable cationic polyelectrolyte encapsulated black phosphorene based impedimetric immunosensor for interleukin-6 detection, *Biosens. Bioelectron.* **2021**, 186, 1873–4235.
- [5] Wang, X.M.; Ma, L.; Hu, C.M.; Liu, T. W.; Sun, S. J.; Liu, X. H.; Guan, M. Simultaneous quantitative detection of IL-6 and PCT using SERS magnetic immunoassay with sandwich structure, *Nanotechnology*, **2021**, 32, 255702.
